# Supplementary material for: Quantifying dating uncertainties in layer-counted paleoclimate proxy archives
Source: Copernicus journal article supplement (doi:10.5194/cp-2021-176), 2021-12-10
Supplement: Supplementary file 1 [file cp-2021-176-supplement.pdf]

Code used to generate the results are available at the GitHub repository

[https://github.com/eirikmn/dating\\_uncertainty](https://github.com/eirikmn/dating_uncertainty)
